# Supplementary material for: Cis → trans and trans → cis isomerizations of styrylcoumarins in the solid state. Importance of the location of free volume in crystal lattices
Source: Royal Society of Chemistry journal article supplement (doi:10.1039/b606027g), 2006-10-01
Supplement: sentto authors_additions and corrections.pdf [file sentto%20authors_additions%20and%20corrections.pdf]

## Additions and corrections

---

### ***Cis* → *trans* and *trans* → *cis* isomerizations of styrylcoumarins in the solid state. Importance of the location of free volume in crystal lattices**

Jarugu Narasimha Moorthy, Parthasarathy Venkatakrishnan, Govardhan Savitha and Richard G. Weiss

*Photochem. Photobiol. Sci.*, 2006, **5**, DOI: 10.1039/b606027g. **Amendment published 18th July 2006.**

---

The authors wish to correct the values given for the NMR data in section 4(c) 'General procedure for the synthesis of 6- and 7-styrylcoumarins (1–4)' as follows.

| Compound        | Value to be corrected                           | Should read                                                                                      |
|-----------------|-------------------------------------------------|--------------------------------------------------------------------------------------------------|
| <i>Cis</i> -1   | 6.71 (dd, $J_1 = 42.5$ Hz, $J_2 = 12.2$ Hz, 2H) | 6.66 (AB <sub>q</sub> , $J_{AB} = 12.2$ Hz, 1H), 6.76 (AB <sub>q</sub> , $J_{AB} = 12.2$ Hz, 1H) |
| <i>Cis</i> -2   | 6.63 (dd, $J_1 = 68.0$ Hz, $J_2 = 12.4$ Hz, 2H) | 6.54 (AB <sub>q</sub> , $J_{AB} = 12.2$ Hz, 1H), 6.71 (AB <sub>q</sub> , $J_{AB} = 12.2$ Hz, 1H) |
| <i>Trans</i> -2 | 7.17 (dd, $J_1 = 45.2$ Hz, $J_2 = 16.3$ Hz, 2H) | 7.11 (AB <sub>q</sub> , $J_{AB} = 16$ Hz, 1H), 7.23 (AB <sub>q</sub> , $J_{AB} = 16.0$ Hz, 1H)   |
| <i>Cis</i> -3   | 6.68 (dd, $J_1 = 45.4$ Hz, $J_2 = 12.2$ Hz, 2H) | 6.60 (AB <sub>q</sub> , $J_{AB} = 12.2$ Hz, 1H), 6.71 (AB <sub>q</sub> , $J_{AB} = 12.2$ Hz, 1H) |
| <i>Trans</i> -3 | 7.12 (dd, $J_1 = 20.1$ Hz, $J_2 = 16.6$ Hz, 2H) | 7.11 (AB <sub>q</sub> , $J_{AB} = 16.4$ Hz, 1H), 7.14 (AB <sub>q</sub> , $J_{AB} = 16.4$ Hz, 1H) |
| <i>Cis</i> -4   | 6.69 (dd, $J_1 = 65.5$ Hz, $J_2 = 12.2$ Hz, 2H) | 6.62 (AB <sub>q</sub> , $J_{AB} = 12.2$ Hz, 1H), 6.78 (AB <sub>q</sub> , $J_{AB} = 12.2$ Hz, 1H) |
| <i>Trans</i> -4 | 7.15 (dd, $J_1 = 44$ Hz, $J_2 = 16.4$ Hz, 2H)   | 7.09 (AB <sub>q</sub> , $J_{AB} = 16.3$ Hz, 1H), 7.20 (AB <sub>q</sub> , $J_{AB} = 16.3$ Hz, 1H) |

---

The Royal Society of Chemistry apologises for these errors and any consequent inconvenience to authors and readers.

---

[Back](#)
